# Supplementary material for: Efficacy of Interceptor G2, Royal Guard and PermaNet 3.0 against pyrethroid- resistant Anopheles gambiae s.l. from Za-Kpota, Southern Benin: an experimental hut trial
Source: Research Square preprint supplement (doi:10.21203/rs.3.rs-4361734/v1), 2024-05-10
Supplement: Supplementary file 1 [file 6527899347d20be59662e12e.docx]

| **Table S1.** Comparative odds ratio of deterrence by treatments | | | | |
| --- | --- | --- | --- | --- |
| **Contrast** | **OR** | **95% CI** | **z value** | **p.value** |
| **Comparison ITNs/UTN** | | | | |
| Interceptor G1 Unwashed | 0.71 | 0.44 - 1.16 | -1.86 | 0.3071 |
| Interceptor G1 Aged | 0.84 | 0.52 - 1.35 | -0.97 | 0.8424 |
| Interceptor G2 Unwashed | 1.02 | 0.65 - 1.61 | 0.12 | 0.9998 |
| Interceptor G2 Aged | 0.53 | 0.15 - 1.90 | -1.33 | 0.6391 |
| PermaNet 2.0 Unwashed | 0.48 | 0.13 - 1.74 | -1.51 | 0.5202 |
| PermaNet 3.0 Unwashed | 0.40 | 0.11 - 1.46 | -1.88 | 0.2974 |
| PermaNet 3.0 Aged | 0.63 | 0.18 - 2.27 | -0.95 | 0.8499 |
| Royal Guard Unwashed | 1.47 | 0.99 - 2.19 | 2.57 | 0.0643 |
| **Comparison ITNs /P2 Unwashed** | | | | |
| Interceptor G1 Unwashed | 1.48 | 0.40 - 5.44 | 0.8 | 0.9121 |
| Interceptor G1 Aged | 1.74 | 0.47 - 6.40 | 1.13 | 0.7570 |
| Interceptor G2 Unwashed | 2.12 | 0.59 - 7.64 | 1.55 | 0.4901 |
| Interceptor G2 Aged | 1.09 | 0.21 - 5.84 | 0.14 | 0.9997 |
| PermaNet 3.0 Unwashed | 0.83 | 0.15 - 4.48 | -0.28 | 0.9970 |
| PermaNet 3.0 Aged | 1.31 | 0.25 - 6.97 | 0.43 | 0.9882 |
| Royal Guard Unwashed | 3.04 | 0.85 - 10.88 | 2.33 | 0.1180 |
| **Comparison ITNs Aged/ITNs Unwashed** | | | | |
| PermaNet 3.0 Aged | 1.57 | 0.29 - 8.41 | 0.72 | 0.9367 |
| Interceptor G1 Aged | 1.18 | 0.72 - 1.94 | 0.87 | 0.8837 |
| Interceptor G2 Aged | 0.52 | 0.14 - 1.86 | -1.37 | 0.6096 |

CI : Confidence intervals

| **Table S2.** Comparative odds ratio of exophily rate by treatments | | | | |
| --- | --- | --- | --- | --- |
| **Contrast** | **OR** | **95% CI** | **z value** | **p.value** |
| **Comparison ITNs/UTN** | | | | |
| Interceptor G1 Unwashed | 1.22 | 0.64 - 2.32 | 0.83 | 0.9001 |
| Interceptor G1 Aged | 1.66 | 0.91 - 3.03 | 2.27 | 0.1383 |
| Interceptor G2 Unwashed | 2.08 | 1.24 - 3.47 | 3.80 | 0.0013** |
| Interceptor G2 Aged | 1.10 | 0.51 - 2.36 | 0.34 | 0.995 |
| PermaNet 2.0 Unwashed | 1.31 | 0.59 - 2.87 | 0.91 | 0.8695 |
| PermaNet 3.0 Unwashed | 0.81 | 0.36 - 1.79 | -0.72 | 0.9354 |
| PermaNet 3.0 Aged | 1.09 | 0.54 - 2.17 | 0.32 | 0.9958 |
| Royal Guard Unwashed | 1.60 | 1.00 - 2.56 | 2.69 | 0.0482* |
| **Comparison ITNs /P2 Unwashed** | | | | |
| Interceptor G1 Unwashed | 0.93 | 0.39 - 2.21 | -0.21 | 0.999 |
| Interceptor G1 Aged | 1.27 | 0.55 - 2.91 | 0.77 | 0.9208 |
| Interceptor G2 Unwashed | 1.59 | 0.73 - 3.43 | 1.61 | 0.4601 |
| Interceptor G2 Aged | 0.84 | 0.33 - 2.18 | -0.49 | 0.9824 |
| PermaNet 3.0 Unwashed | 0.62 | 0.23 - 1.64 | -1.32 | 0.6448 |
| PermaNet 3.0 Aged | 0.83 | 0.34 - 2.04 | -0.55 | 0.9731 |
| Royal Guard Unwashed | 1.22 | 0.58 - 2.57 | 0.73 | 0.9342 |
| **Comparison ITNs Aged/ITNs Unwashed** | | | | |
| PermaNet 3.0 Aged | 1.35 | 0.54 - 3.34 | 0.88 | 0.8829 |
| Interceptor G1 Aged | 1.36 | 0.68 - 2.73 | 1.19 | 0.7294 |
| Interceptor G2 Aged | 0.53 | 0.25 - 1.12 | -2.29 | 0.1327 |

CI : Confidence intervals; *: degree of significance

| **Table S3.** Comparative odds ratio of ovipositing by treatments | | | | |
| --- | --- | --- | --- | --- |
| **Contrast** | **OR** | **95% CI** | **z value** | **p.value** |
| **Comparison ITNs/UTN** | | | | |
| Interceptor G1 Unwashed | 0,03 | 0.0028 - 0.35 | -3,85 | 0,0013* |
| Interceptor G1 Aged | 0,06 | 0.0067 - 0.60 | -3,30 | 0,0086* |
| Interceptor G2 Unwashed | 0,03 | 0.00337 -0.18 | -4,95 | <0.0010** |
| Interceptor G2 Aged | 7,5881E+10 | 2.2E-16 - inf | 0,00 | 1,00 |
| PermaNet 2.0 Unwashed | 0,1 | 0.0089 -1.03 | -2,66 | 0,06 |
| PermaNet 3.0 Unwashed | 0,08 | 0.0063 - 0.93 | -2,77 | 0,0413* |
| PermaNet 3.0 Aged | 0,01 | 0.0007- 0.19 | -4,30 | <0.0010** |
| Royal Guard Unwashed | 1,2803E-10 | 2.22E-16 - inf | 0,00 | 1,00 |
| **Comparison ITNs /P2 Unwashed** | | | | |
| Interceptor G1 Unwashed | 0,33 | 0.0173 -6.28 | 0,02 | 0,8228 |
| Interceptor G1 Aged | 0,66 | 0.041 - 10.77 | 0,04 | 0,9912 |
| Interceptor G2 Unwashed | 0,26 | 0.030 - 2.25 | 0,03 | 0,4174 |
| Interceptor G2 Aged | 7,8716E+11 | 2.22E-16 - inf | 0,00 | 1 |
| PermaNet 3.0 Unwashed | 0,8 | 0.042 - 14.98 | 0,04 | 0,999 |
| PermaNet 3.0 Aged | 0,13 | 0.0091 - 1.77 | 0,01 | 0,1964 |
| Royal Guard Unwashed | 1,3281E-09 | 2.22E-16 - inf | 0,00 | 1 |
| **Comparison ITNs Aged/ITNs Unwashed** | | | | |
| PermaNet 3.0 Aged | 1,07 | 0.65 - 1.7 | 0,36 | 0,9907 |
| Interceptor G1 Aged | 1,98 | 1.29 - 3.01 | 4,26 | <0.0010** |
| Interceptor G2 Aged | 0,8 | 0.57 - 1.01 | -1,81 | 0,3094 |

CI: Confidence Intervals; *: degree of significance
